# Supplementary material
Source: publisher figshare collection journal article supplement (https://geolsoc.figshare.com/articles/dataset/_/3453230)
Supplement: Supplementary file 2 [file 1]

| Mollusc spp.                  | Water: still/<br>flowing?                 | Water purity:<br>clean/polluted? | Substrate                                  | Oxygen<br>content             | pH<br>range | Salinity<br>tolerance | Water<br>hardness | Depth<br>(m)  |
|-------------------------------|-------------------------------------------|----------------------------------|--------------------------------------------|-------------------------------|-------------|-----------------------|-------------------|---------------|
| <i>Acroloxus lacustris</i>    | slowly flowing                            | clean (highly vegetated)         | plant stems                                | high                          | 6.0 to 8.9  | -                     | hard and soft     | <13           |
| <i>Bathyompalus contortus</i> | slowly flowing and still                  | clean? (highly vegetated)        | -                                          | high?                         | 5.2 to 9.6  | -                     | -                 | ?2 rarely >20 |
| <i>Bythinia tentaculata</i>   | slowly flowing and still                  | clean? (highly vegetated)        | all particle sizes and occasionally plants | high?                         | 6.6 to 8.4  | -                     | -                 | <15           |
| <i>B. leachii</i>             | slowly flowing                            | very clean (highly vegetated)    | -                                          | high?                         | -           | ?5% salt              | -                 | <3            |
| <i>Pisidium amnicum</i>       | flowing and still                         | clean                            | soft? (near water plants)                  | high?                         | -           | -                     | -                 | usually 10-35 |
| <i>P. henslowanum</i>         | flowing and still, including marsh drains | highly vegetated                 | sandy, rich in organic matter              | very clean (highly vegetated) | -           | -                     | moderately hard   | usually <25   |
| <i>P. Moitessierianum</i>     | slowly flowing and still                  | clean                            | sand to fine mud                           | high                          | -           | -                     | -                 | -             |
| <i>P. nitidum</i>             | flowing and still, including marsh drains | clean                            | mud or sand, with plants                   | high                          | -           | -                     | hard and soft     | usually <20   |
| <i>?P. pseudo sphaerium?</i>  | swamps and ditches, mostly still          | very clean (highly vegetated)    | calcareous                                 | high?                         | -           | -                     | -                 | -             |
| <i>Planorbis carinatus</i>    | slowly flowing and still                  | clean? (highly vegetated)        | mud                                        | high                          | -           | -                     | -                 | -             |
| <i>Radix balthica</i>         | flowing and still                         | -                                | gravel and sand                            | -                             | 5.8 to 9.9  | ?1.4%                 | -                 | usually 0.2-2 |
| <i>Radix labiata</i>          | slowly flowing and still                  | -                                | plants, gravel or sand                     | -                             | -           | -                     | -                 | -             |
| <i>Uni tumidus</i>            | flowing                                   | clean                            | -                                          | -                             | -           | -                     | -                 | -             |
| <i>Valvata cristata</i>       | slowly flowing and still                  | clean? (highly vegetated)        | mud                                        | high                          | -           | ?0.5%                 | -                 | -             |
| <i>V. macrostoma</i>          | exclusively marsh drains and ditches      | clean? (highly vegetated)        | -                                          | -                             | -           | -                     | -                 | -             |
| <i>V. piscinalis</i>          | flowing and still                         | clean                            | mud or silt                                | high                          | -           | 0.4%                  | hard and soft     | usually 3-10  |
| <i>V. viviparus</i>           | slowly flowing and still                  | -                                | mud                                        | high                          | 6.8 to 8.6  | 3%                    | -                 | -             |
