# Supplementary material
Source: publisher figshare collection journal article supplement (https://geolsoc.figshare.com/articles/dataset/_/3453230)
Supplement: Supplementary file 3 [file 1]

|           | Marine                                     | Marine/estuary                  | Estuary                         | Estuary/saltmarsh             |
|-----------|--------------------------------------------|---------------------------------|---------------------------------|-------------------------------|
| MPA 61281 | <i>Callistocythere littoralis</i>          | <i>Semicytherura angulata</i>   | <i>Loxoconcha</i> sp.           | <i>Leptocythere lacertosa</i> |
| ~-4.2m    | <i>Xestoleberis nitida</i>                 | <i>Semicytherura</i> sp.        | ? <i>Sarsicytheridea</i> sp.    |                               |
| MPA 61282 |                                            | <i>Semicytherura nigrescens</i> | <i>Loxoconcha</i> sp.           | <i>Leptocythere lacertosa</i> |
| ~-3.8m    |                                            |                                 | <i>Cytherois fisheri</i>        | <i>L. Porcellanea</i>         |
|           |                                            |                                 | <i>Loxoconcha elliptica</i>     |                               |
| MPA 61283 | <i>Cytheropteron</i> sp.cf. <i>nodosum</i> | <i>Semicytherura sella</i>      | ? <i>Sarsicytheridea bradii</i> | <i>Leptocythere lacertosa</i> |
| ~-2.6m    | <i>Hemicytherura cellulosa</i>             |                                 |                                 | <i>Leptocythere</i> sp.       |
|           | <i>Neocytherideis sublata</i>              |                                 |                                 |                               |
| MPA 61284 | <i>Neocytherideis sublata</i>              | <i>Semicytherura nigrescens</i> | <i>Loxoconcha elliptica</i>     | <i>Leptocythere lacertosa</i> |
| ~-1.4m    | <i>Xestoleberis nitida</i>                 |                                 | <i>Loxoconcha rhomboidea</i>    | <i>Leptocythere</i> sp.       |
|           |                                            |                                 | ? <i>Sarsicytheridea bradii</i> |                               |
