# Supplementary material
Source: publisher figshare collection journal article supplement (https://geolsoc.figshare.com/articles/dataset/_/3453230)
Supplement: Supplementary file 4 [file 1]

| Samples                                                       | MPA 61285   | MPA 61286   | MPA 61287 | MPA 61288  |
|---------------------------------------------------------------|-------------|-------------|-----------|------------|
| Fractions (µm)                                                | 500         | 500         | 500       | 500        |
| <i>Acroloxus lacustris</i> (Linné, 1758)<br>% of fraction     | 5<br>10.63  |             |           | 1<br>4.54  |
| <i>Bathyomphalus contortus</i> (Linné, 1758)<br>% of fraction |             |             |           | 1<br>4.54  |
| <i>Bithynia tentaculata</i> (Linné, 1758)<br>% of fraction    |             | 5<br>5.81   |           | 1<br>4.54  |
| <i>Bithynia leachii</i> (Sheppard, 1823)<br>% of fraction     |             | 6<br>6.97   |           |            |
| <i>Pisidium amnicum</i> (Müller, 1774)<br>% of fraction       |             | 1<br>1.16   |           |            |
| <i>Pisidium henslowanum</i> (Sheppard, 1823)<br>% of fraction | 4<br>8.51   | 6<br>6.97   |           |            |
| <i>P. Moitessierianum</i> Paladilhe, 1866<br>% of fraction    | 3<br>6.38   |             | 4<br>40   | 1<br>4.54  |
| <i>P. nitidum</i> Jenyns, 1832<br>% of fraction               | 13<br>27.65 | 11<br>12.79 | 1<br>10   | 3<br>13.63 |
| ? <i>P. pseudospaerium</i> ? (Favre, 1927)<br>% of fraction   | 2<br>4.25   |             |           |            |
| <i>Planorbis carinatus</i> Müller, 1774<br>% of fraction      | 1<br>2.12   | 7<br>8.13   |           |            |
| <i>Radix balthica</i> (Müller, 1774)<br>% of fraction         |             | 3<br>3.48   |           |            |
| <i>Radix labiata</i> (Rossmässler, 1835)<br>% of fraction     | 5<br>10.63  |             | 1<br>10   |            |
| <i>Unio tumidus</i> Philipsson, 1788<br>% of fraction         |             |             | 1<br>10   |            |
| <i>Valvata cristata</i> (Müller, 1774)<br>% of fraction       | 1<br>23.40  | 14<br>16.27 |           | 3<br>13.63 |
| <i>Valvata macrostoma</i> Mörch, 1864<br>% of fraction        | 1<br>2.12   | 20<br>23.25 | 2<br>20   | 5<br>22.72 |
| <i>V. piscinalis</i> (Müller, 1774)<br>% of fraction          | 2<br>4.25   | 2<br>2.32   |           | 4<br>18.18 |
| <i>Viviparus viviparus</i> (Linné, 1758)<br>% of fraction     |             | 11<br>12.79 | 1<br>10   | 3<br>13.63 |
| <b>Total</b><br><b>%total</b>                                 | 47<br>100   | 86<br>100   | 10<br>100 | 22<br>100  |
