# Supplementary material
Source: publisher figshare collection journal article supplement (https://geolsoc.figshare.com/articles/dataset/_/3453230)
Supplement: Supplementary file 5 [file 1]

| Environment                                   | Shelf | IS/TF/Est | Est-LM | LM-HM | MH-HM | HM | RW  | No.of specimens per 1g |
|-----------------------------------------------|-------|-----------|--------|-------|-------|----|-----|------------------------|
| % of foraminifera species in each environment |       |           |        |       |       |    |     |                        |
| MPA 61281<br>~-4.2m                           | 13.6  | 0.8       | 66.0   | 11.1  | 5.7   | 0  | 2.3 | 612                    |
| MPA 61282<br>~-3.8m                           | 13.0  | 4.8       | 75.0   | 2.6   | 3.0   | 0  | 1.3 | 1094                   |
| MPA 61283<br>~-2.6m                           | 12.6  | 6.8       | 78.8   | 1.4   | 0.13  | 0  | 0.3 | 5109                   |
| MPA 61284<br>~-1.4m                           | 7.0   | 1.0       | 79.4   | 9.7   | 2.9   | 0  | 0.1 | 1212                   |
